# Supplementary material for: HMGB2 upregulation promotes the progression of hepatocellular carcinoma cells through the activation of ZEB1/vimentin axis
Source: PubMed Central journal article supplement — J Gastrointest Oncol. 2023 Oct 24;14(5):2178–91. doi: 10.21037/jgo-23-447 (PMC10643579; doi:10.21037/jgo-23-447), 2023-10-24
Supplement: jgo-14-05-2178-dss.pdf [file jgo-14-05-2178-dss.pdf]

## Data Sharing Statement

|                     |                                                                                                                                                     |                                                                                                                  |
|---------------------|-----------------------------------------------------------------------------------------------------------------------------------------------------|------------------------------------------------------------------------------------------------------------------|
| <b>Article Info</b> | <a href="https://dx.doi.org/10.21037/jgo-23-447">https://dx.doi.org/10.21037/jgo-23-447</a>                                                         |                                                                                                                  |
| <b>Item</b>         | <b>Question</b>                                                                                                                                     | <b>Authors' Response<br/>(place "-" if not applicable)</b>                                                       |
| 1                   | Would you like to share data collected for your study to others?                                                                                    | Yes                                                                                                              |
| 2                   | If not, would you like to share the reason for your decision?                                                                                       | -                                                                                                                |
| 3                   | What data in particular will be shared?                                                                                                             | The clinical and survival data in particular will be shared, which has seldom been provided in previous studies. |
| 4                   | Any other documents will be shared? Such as study protocol, statistical analysis plan, informed consent form, clinical study report, analytic code. | Statistical analysis plan and clinical data will also be shared if requested.                                    |
| 5                   | When will data availability begin?                                                                                                                  | From the publication date.                                                                                       |
| 6                   | When will data availability end?                                                                                                                    | Two years with the publication date, since the technique or survival data may be updated over time.              |
| 7                   | To whom will you share the data?                                                                                                                    | Medical oncologists and clinical surgeons who are interested in this study.                                      |
| 8                   | For what type of analysis or purpose?                                                                                                               | For analysis to evaluate the safety of HMGB2 in HCC patients.                                                    |
| 9                   | How or where can the data/documents be obtained?                                                                                                    | Emails could be sent to the address below to obtain the shared data: lukaiehbh@163.com                           |
| 10                  | Any other restrictions?                                                                                                                             | We may balance the potential benefits and risks for each request and then provide the data that could be shared. |
